# Supplementary material for: The infectious salmon anemia virus esterase prunes erythrocyte surfaces in infected Atlantic salmon and exposes terminal sialic acids to lectin recognition
Source: PubMed Central journal article supplement (PMC10167051; doi:10.3389/fimmu.2023.1158077), 2023-04-25

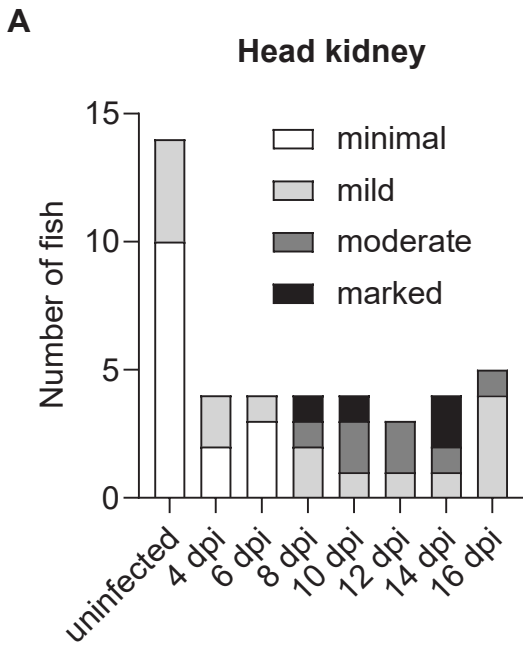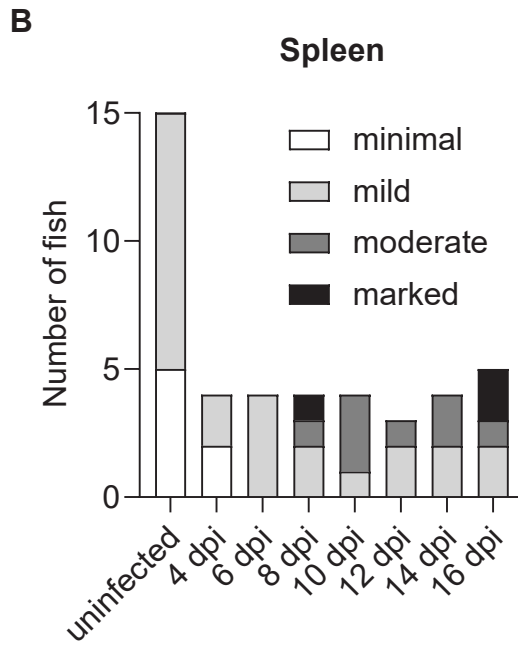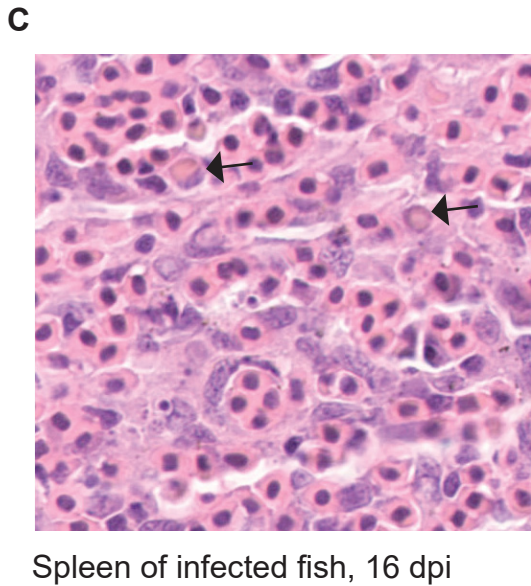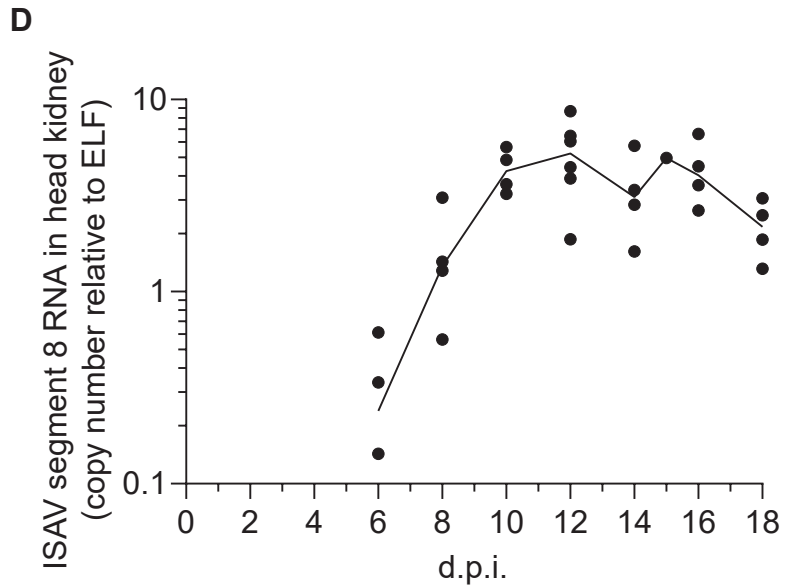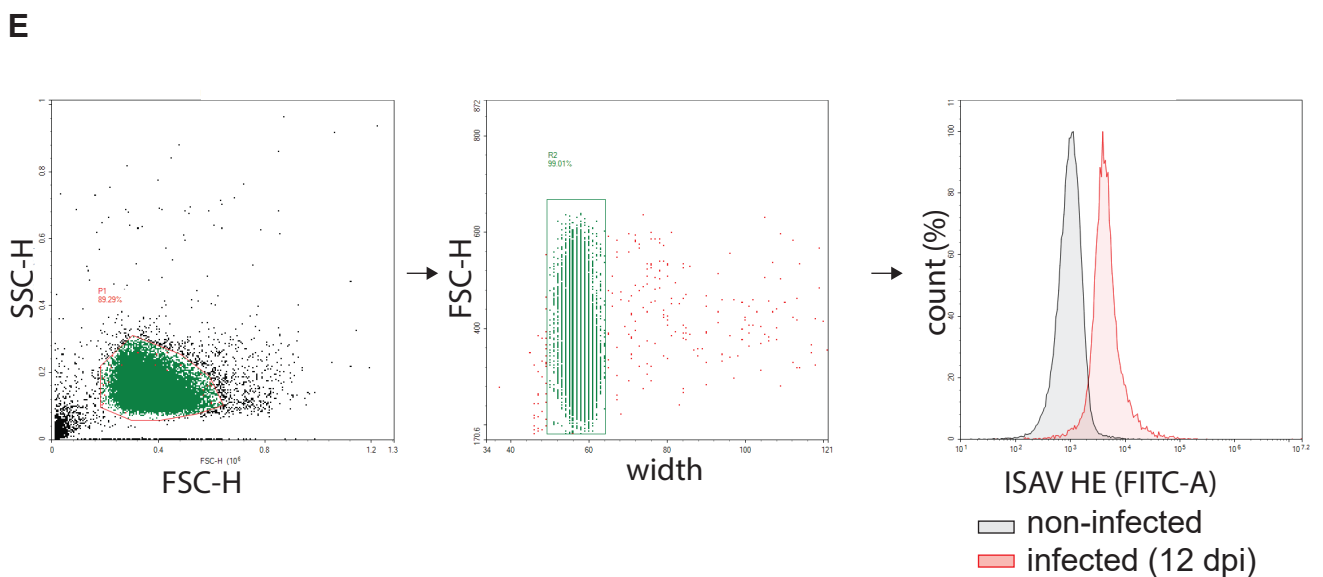

Supplement: Image_1.pdf [file Image_1.pdf]
