# Supplementary material for: The infectious salmon anemia virus esterase prunes erythrocyte surfaces in infected Atlantic salmon and exposes terminal sialic acids to lectin recognition
Source: PubMed Central journal article supplement (PMC10167051; doi:10.3389/fimmu.2023.1158077), 2023-04-25

**A**

ISAV HE signal (FITC-A mean)

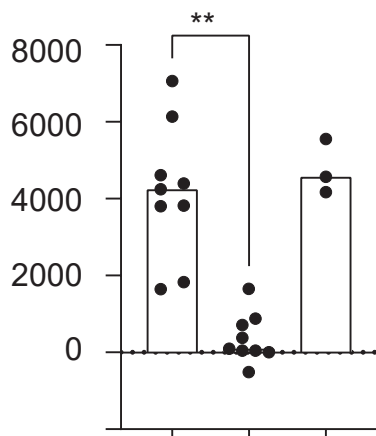

|               |   |   |   |
|---------------|---|---|---|
| ISAV (60 min) | + | + | + |
| 9G1F10A       | - | + | - |
| D67J          | - | - | + |

**B**mAb conc ( $\mu\text{g/mL}$ )

5

2.5

1.25

0.625

0.313

0.156

9G1F10A

no antibody

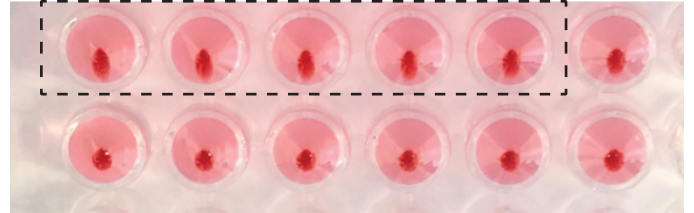

Supplement: Image_2.pdf [file Image_2.pdf]
